# Supplementary material for: OGT mediates O-GlcNAcylation of MEIS2 and affects palatal osteogenic development
Source: Research Square preprint supplement (doi:10.21203/rs.3.rs-6581419/v1), 2025-05-15
Supplement: Supplementary file 1 [file e887c98244e52629a55d4c90.docx]

**SUPPLEMENTARY TABLES**

**Table 1**

Primers of plasmids.

| Gene | Primer | Sequence 5’→3’ |
| --- | --- | --- |
| OGT | Forward | CTTGGTACCGAGCTCGGATCCGCCACCATGGCGTCTTCCGTGGGC |
|  | Reverse | GAAGGGCCCTCTAGACTCGAGTGCTGACTCAGTGACTTCAAC |
| MEIS2-WT | Forward | CTTGGTACCGAGCTCGGATCCGCCACCATGGCGCAAAGGTACGATG |
|  | Reverse | GAAGGGCCCTCTAGACTCGAGTTGGGCATGAATGTCCAT |
| MEIS2-S237A | Forward | GGAGACCCAAGCTGGCTAGTTAAGCTTGGTACCGAGCTCGGATCCG |
|  | Reverse | TCTGGGAAGCATGGCCCCCTGCGGAGGGCCCTGGGGTGCCTGC |

**Table 2**

shRNA targets

| NO. | Target Sequences |
| --- | --- |
| NC | TTCTCCGAACGTGTCACGT |
| shOGT | GCCCTAAGTTTGAGTCCAAAT |
| shMEIS2 | CCCATGATTGACCAGTCAAAT |

**Table 3**

Q-PCR primers

| Gene | Primer | Sequence |
| --- | --- | --- |
| *GAPDH(H)* | Forward | AGCCACATCGCTCAGACAC |
|  | Reverse | GCCCAATACGACCAAATCC |
| *OGT(H)* | Forward | ATAATACAGCTCTCCGTCTGTG |
|  | Reverse | ATGCTTTACGATACAAGCGAAC |
| *MEIS2(H)* | Forward | CTCGTCATTGATGAAAGAGACGG |
|  | Reverse | TCAGCGAGATTTGTGGAGGAG |
| *OCN(H)* | Forward | CACTCCTCGCCCTATTGGC |
|  | Reverse | CCCTCCTGCTTGGACACAAAG |
| *COL1A1(H)* | Forward | GTGCGATGACGTGATCTGTGA |
|  | Reverse | CGGTGGTTTCTTGGTCGGT |
| *RUNX2(H)* | Forward | TGGTTACTGTCATGGCGGGTA |
|  | Reverse | TCTCAGATCGTTGAACCTTGCTA |
| *OSX(H)* | Forward | GAGGCAACTGGCTAGGTGG |
|  | Reverse | CTGGATTAAGGGGAGCAAAGTC |
| *gapdh(Z)* | Forward | ATTGCCGTTCATCCATCTT |
|  | Reverse | TGCCATCAGGTCACATACAC |
| *ogt(Z)* | Forward | ATGCTTATTGTAACCTTGCTCATTGTC |
|  | Reverse | ATGGCAGGCGGTTCTTCTCC |

**SUPPLEMENTARY FIGURE LEGENDS**

**Fig. S1** RT-qPCR assessing the *ogt* knockdown efficiency in the *ogt* MO injected and OSMI-1 treated embryos. n = 4. Data were indicated by mean ± SD. P values were computed by two-tailed t-tests, *P < 0.05, **P < 0.01.

**Fig. S2** Quantification of EDU-positive cells in shCtrl and shOGT HEPM cells. shCtrl is short for short hairpin control (control lentivirus); shOGT is short for short hairpin OGT (OGT lentivirus). n = 3. Data were indicated by mean ± SD. P values were computed by two-tailed t-tests, *P < 0.05, **P < 0.01.

**Fig. S3** Quantification data for relative protein levels in **Fig. 3E**. n = 3. Data were indicated by mean ± SD. P values were computed by two-tailed t-tests, *P < 0.05, **P < 0.01.

**Fig. S4** Quantification data for relative protein levels in **Fig. 4E**. n = 3. Data were indicated by mean ± SD. P values were computed by two-tailed t-tests, *P < 0.05, **P < 0.01.
